# Supplementary material for: High preoperative serum globulin in hepatocellular carcinoma is a risk factor for poor survival
Source: PubMed Central journal article supplement — J Cancer. 2019 Jun 9;10(15):3494–500. doi: 10.7150/jca.29499 (PMC6603401; doi:10.7150/jca.29499), 2019-06-09
Supplement: jcav10p3494s1.pdf [file jcav10p3494s1.pdf]

**Table S1. Clinical features of patients with HCC in the validation cohort**

|                    | n=100     | %     |
|--------------------|-----------|-------|
| Age (year)         | 50(42-78) |       |
| Sex                |           |       |
| male               | 72        | 72.0% |
| female             | 28        | 28.0% |
| HbsAg              |           |       |
| negative           | 12        | 12.0% |
| positive           | 88        | 88.0% |
| ALT (U/L)          |           |       |
| ≤45                | 70        | 70.0% |
| >45                | 30        | 30.0% |
| AFP (ng/ml)        |           |       |
| ≤13.6              | 45        | 45.0% |
| >13.6              | 55        | 55.0% |
| Cirrhosis          |           |       |
| absent             | 15        | 15.0% |
| present            | 85        | 85.0% |
| Vascular invasion  |           |       |
| absent             | 34        | 34.0% |
| present            | 66        | 66.0% |
| Tumor multiplicity |           |       |
| solitary           | 69        | 69.0% |
| multiple           | 31        | 31.0% |
| Tumor size (cm)    |           |       |
| ≤5                 | 62        | 62.0% |
| >5                 | 38        | 38.0% |
| Edmondson grade    |           |       |
| I-II               | 57        | 57.0% |
| III-IV             | 43        | 43.0% |
| GLB (g/L)          |           |       |
| ≤ 32.7             | 46        | 46%   |
| > 32.7             | 54        | 54%   |
| ALB(g/L)           |           |       |
| ≤ 40.6             | 49        | 49%   |
| > 40.6             | 51        | 51%   |
| AGR                |           |       |
| ≤ 1.4              | 40        | 40%   |
| > 1.4              | 60        | 60%   |

1

2

3 **Table S2. Univariate and multivariate survival analyses evaluating GLB, ALB, and AGR**  
 4 **influencing CSS in HCC of the validation cohort.**

| Variable    | Univariate analysis |                        |       | Multivariate analysis |    |
|-------------|---------------------|------------------------|-------|-----------------------|----|
|             | 5-year CCS          | Log rank $\chi^2$ test | P     | HR(95%CI)             | P  |
| Sex         |                     | 0.373                  | 0.469 |                       | NI |
|             | Male                | 29.4%                  |       |                       |    |
|             | Female              | 25.3%                  |       |                       |    |
| Age         |                     | 0.159                  | 0.308 |                       | NI |
|             | ≤60                 | 30.6%                  |       |                       |    |
|             | >60                 | 28.5%                  |       |                       |    |
| HbsAg       |                     | 0.371                  | 0.570 |                       | NI |
|             | negative            | 28.1%                  |       |                       |    |
|             | positive            | 26.6%                  |       |                       |    |
| ALT (U/L)   |                     | 0.775                  | 0.750 |                       | NI |
|             | ≤45                 | 31.2%                  |       |                       |    |
|             | >45                 | 27.7%                  |       |                       |    |
| AFP (ng/ml) |                     | 0.833                  | 0.375 |                       | NI |
|             | ≤13.6               | 29.5%                  |       |                       |    |
|             | >13.6               | 25.7%                  |       |                       |    |
| Cirrhosis   |                     | 2.433                  | 0.085 |                       | NI |
|             | absent              | 30.5%                  |       |                       |    |
|             | present             | 25.9%                  |       |                       |    |

|                    |          |       |        |       |                     |       |
|--------------------|----------|-------|--------|-------|---------------------|-------|
| Vascular invasion  |          |       | 8.235  | 0.012 |                     | 0.004 |
|                    | absent   | 22.4% |        |       | Reference           |       |
|                    | present  | 35.1% |        |       | 2.054 (1.431-3.115) |       |
| Tumor multiplicity |          |       | 17.832 | 0.000 |                     | 0.000 |
|                    | solitary | 21.2% |        |       | Reference           |       |
|                    | multiple | 47.1% |        |       | 0.322 (0.239-0.562) |       |
| Tumor size (mm)    |          |       | 25.815 | 0.000 |                     | 0.000 |
|                    | ≤ 5      | 36.1% |        |       | Reference           |       |
|                    | > 5      | 14.7% |        |       | 2.228 (1.493-3.159) |       |
| Edmondson grade    |          |       | 25.446 | 0.000 |                     | 0.000 |
|                    | I-II     | 37.7% |        |       | Reference           |       |
|                    | III-IV   | 15.5% |        |       | 2.663 (1.794-4.155) |       |
| GLB (g/L)          |          |       | 9.956  | 0.002 |                     | 0.032 |
|                    | ≤ 32.7   | 29.3% |        |       | Reference           |       |
|                    | > 32.7   | 15.3% |        |       | 1.376 (1.049-2.795) |       |
| ALB (g/L)          |          |       | 10.038 | 0.003 |                     | 0.039 |
|                    | ≤ 40.6   | 22.2% |        |       | Reference           |       |
|                    | > 40.6   | 40.1% |        |       | 0.622 (0.439-0.972) |       |
| AGR                |          |       | 13.172 | 0.000 |                     | 0.194 |
|                    | ≤ 1.4    | 24.3% |        |       | Reference           |       |
|                    | > 1.4    | 38.7% |        |       | 0.711 (0.419-1.134) |       |

5 NI: not included in multivariate survival analysis

6 HR: hazard ratio, CI: confidence interval, GLB: globulin, ALB: albumin, AGR:

7 albumin/globulin ratio

8

9
